# Supplementary material
Source: MDPI journal article supplement (https://www.mdpi.com/2076-3417/14/7/2944)
Supplement: s1 [file s1]

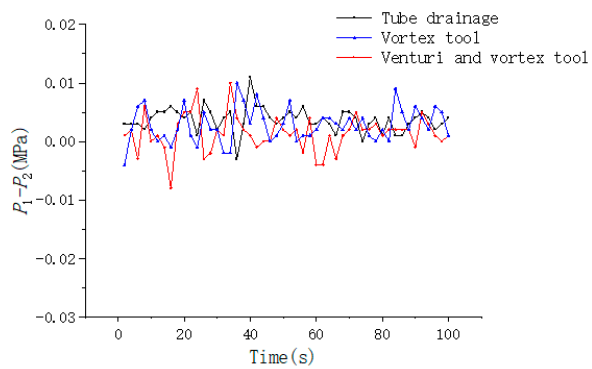

(a) 100 m<sup>3</sup>/h

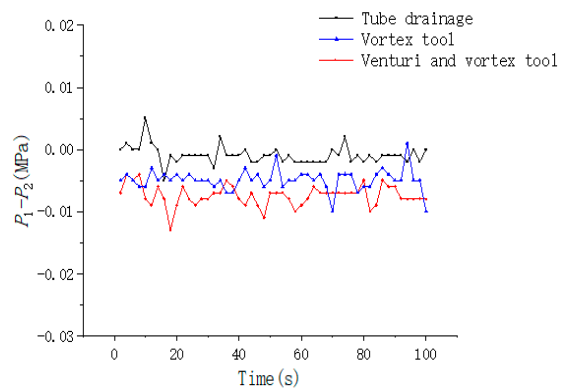

(b) 200 m<sup>3</sup>/h

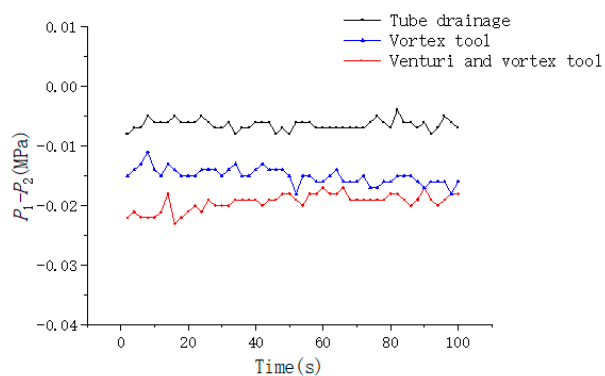

(c) 300 m<sup>3</sup>/h

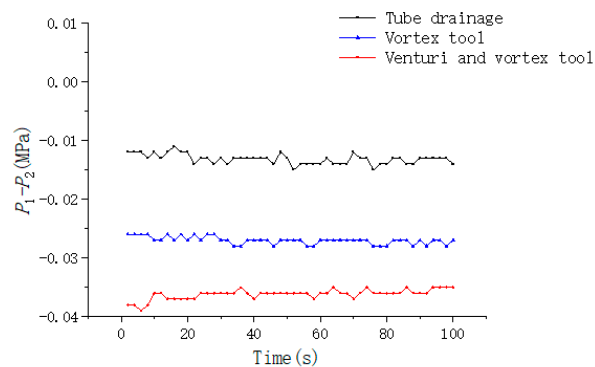

(d) 400 m<sup>3</sup>/h

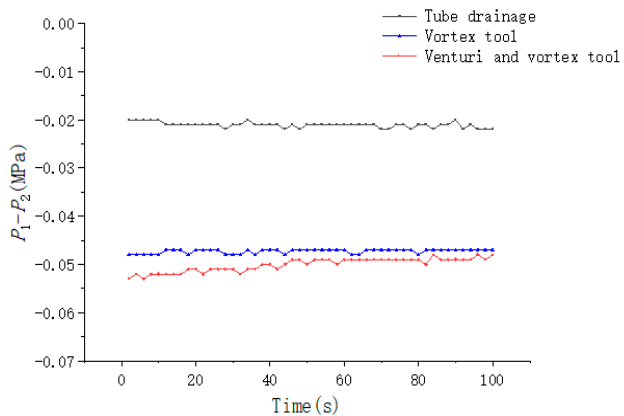

(e) 500 m<sup>3</sup>/h

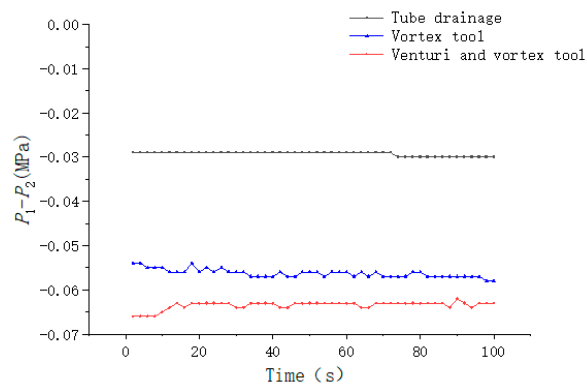

(f) 600 m<sup>3</sup>/h

**Figure S1.** Instantaneous pressure drop of different tools in the horizontal tube with liquid flow rate of 3L/min and gas flow rates of 100 - 600m<sup>3</sup>/h

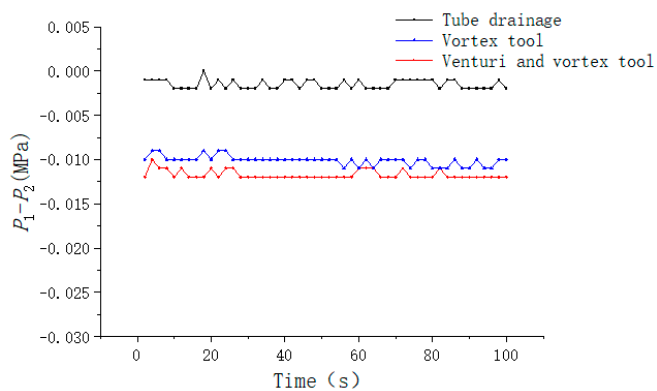

(a) 1L/min

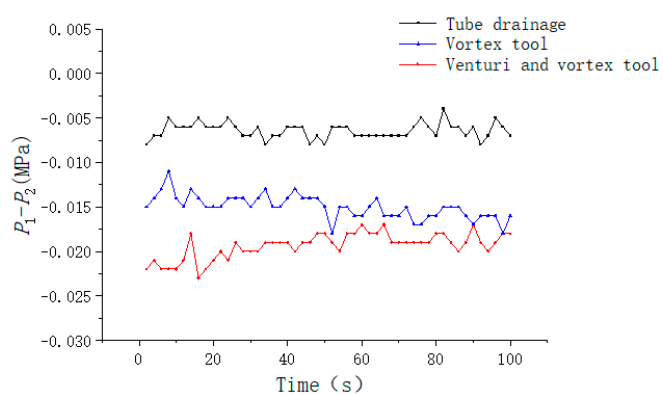

(b) 3L/min

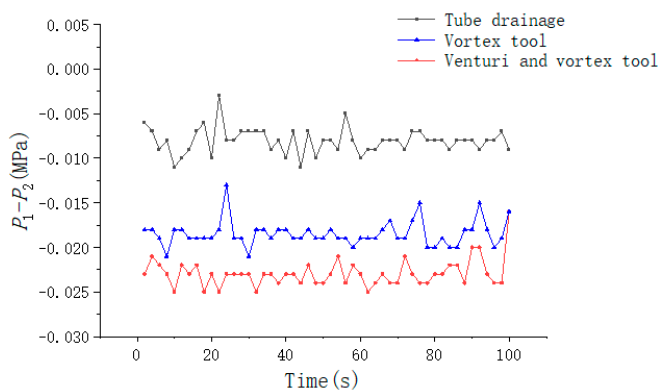

(c) 5L/min

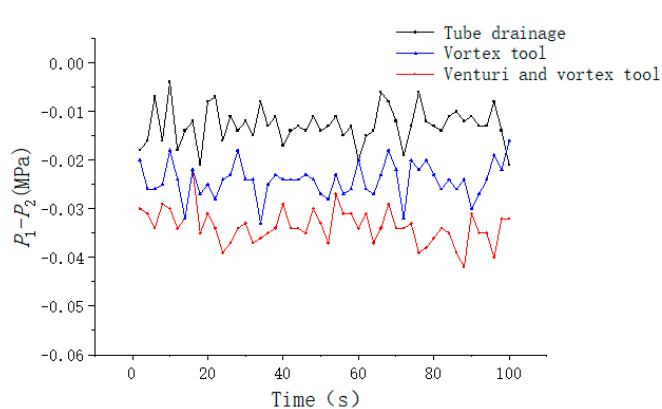

(d) 10L/min

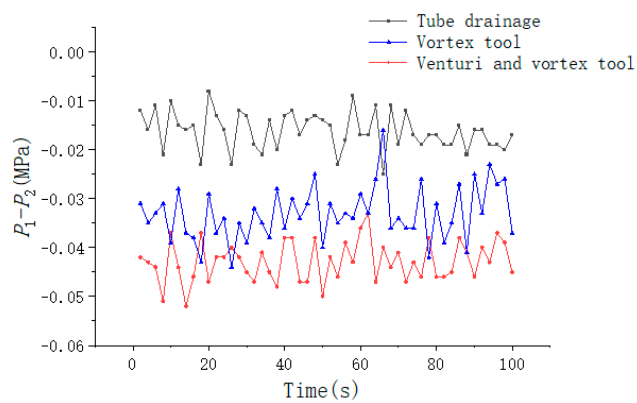

(e) 15L/min

**Figure S2.** Instantaneous pressure drop of venturi and vortex tool in the horizontal tube with different liquid flow rates (1,3,5,10,15 L/min) and the gas flow rate of 300m<sup>3</sup>/h
